# Supplementary material
Source: Springer Nature journal article supplement (https://www.springermedizin.de/resource/supplementary/12889_2010_2776_MOESM1_ESM.pdf/9488840)

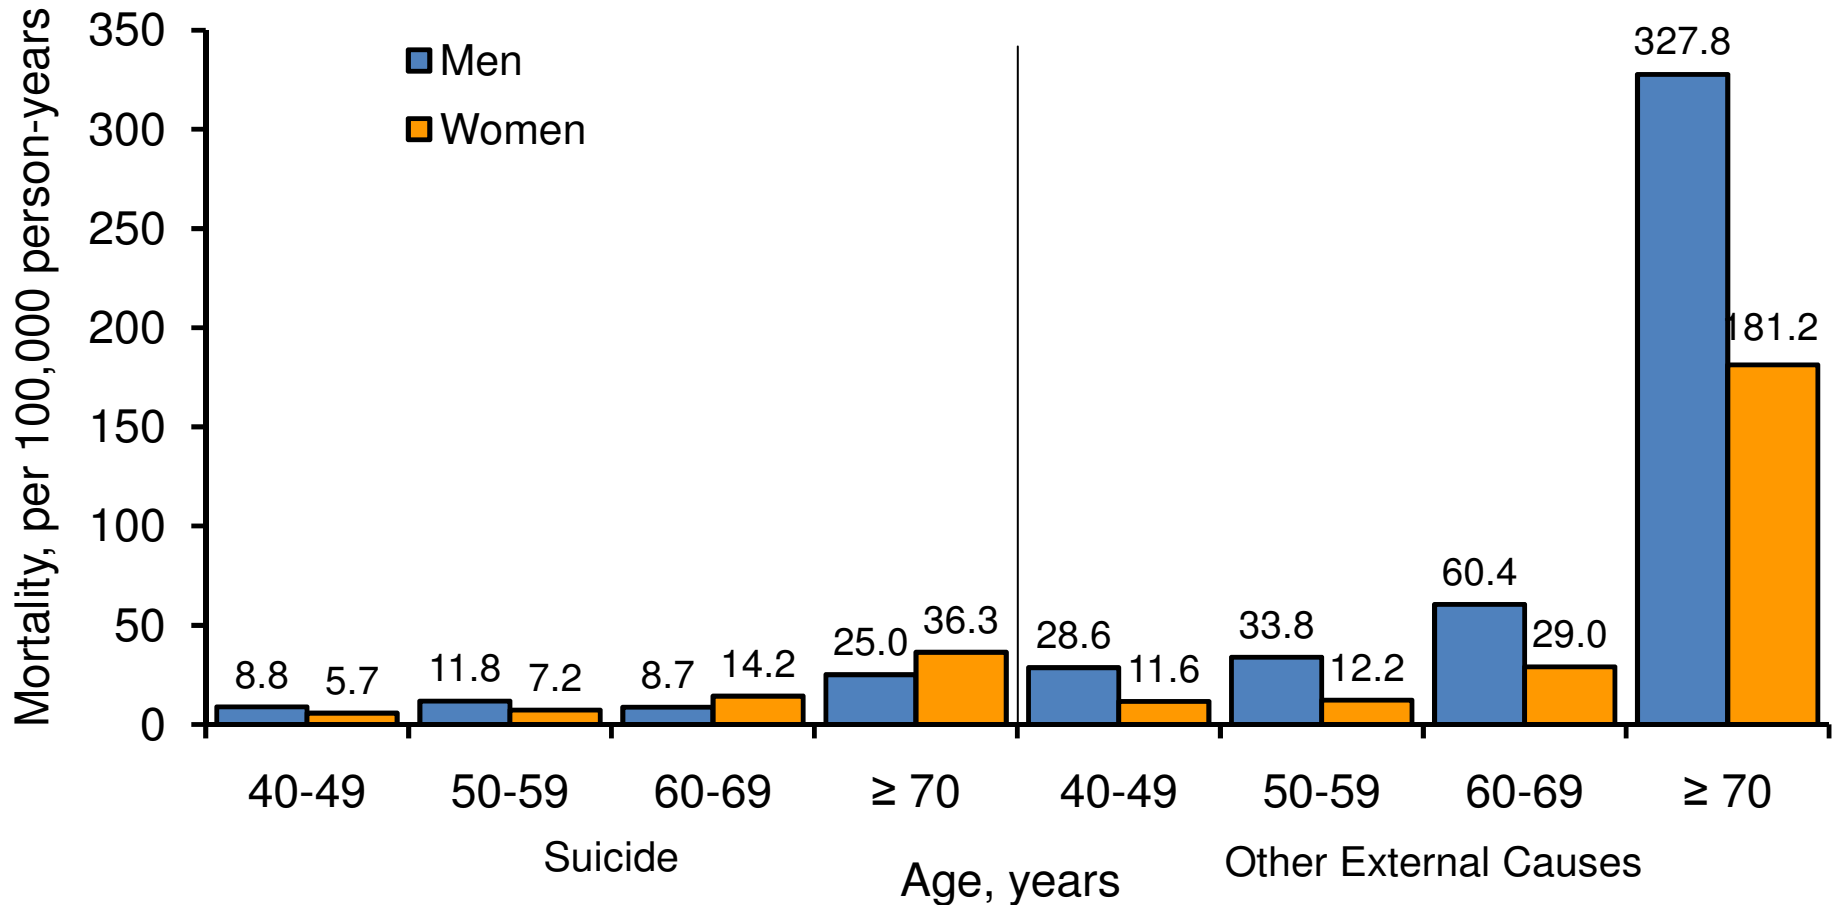

Supplement: MOESM1 [file 9488840]
